# Supplementary material for: Structure of a human translation termination complex
Source: PubMed Central journal article supplement — Nucleic Acids Res. 2015 Oct 10;43(18):8615–26. doi: 10.1093/nar/gkv909 (PMC4605324; doi:10.1093/nar/gkv909), 2015-10-10
Supplement: supp_gkv909_nar-01955-r-2015-File003.pdf [file supp_gkv909_nar-01955-r-2015-File003.pdf]

## SUPPLEMENTARY DATA

Figure S1

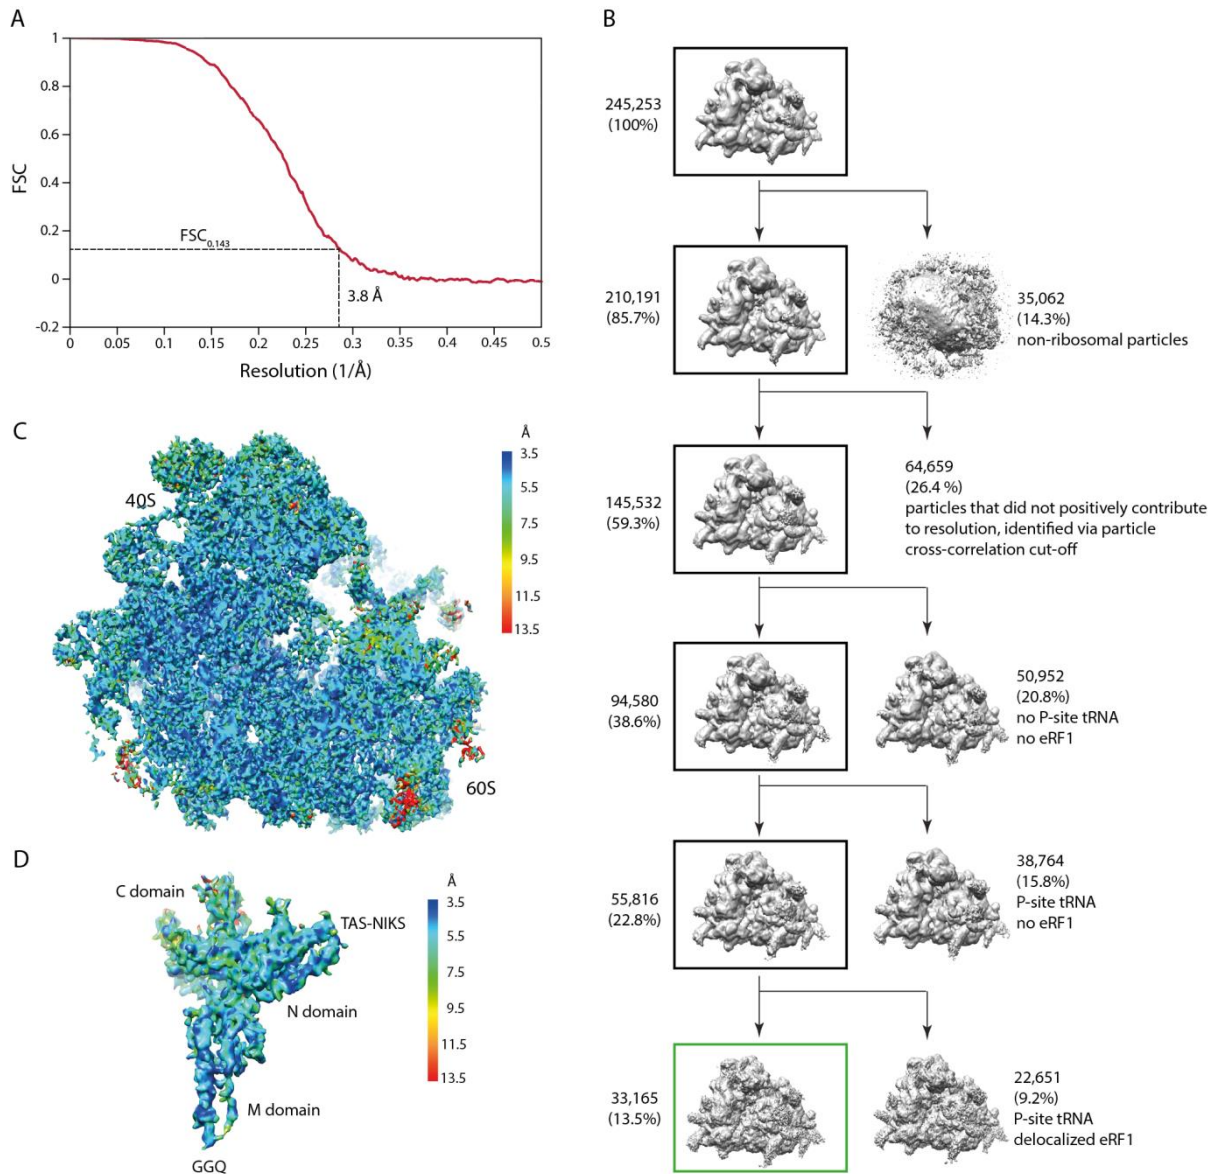

**Figure S1 Average resolution, local resolution and particle sorting scheme of the cryo-EM reconstruction.**

**(A)** The average resolution of the final reconstruction of the eRF1 bound 80S-CMV-RNC was estimated to be 3.8 Å based on the Fourier shell correlation (FSC) cut-off criterion at 0.143. The FSC was derived from half-map reconstructions processed in the absence of spatial frequencies higher than 8 Å (see also Material and Methods). **(B)** *In silico* particle sorting scheme for obtaining the final dataset. **(C)** Section of the cryo-EM map of the eRF1 bound 80S-CMV-RNC colored according to the local resolution as calculated by the ResMap software. **(D)** Local resolution of isolated eRF1 in the cryo-EM map colored as in (C).

Figure S2

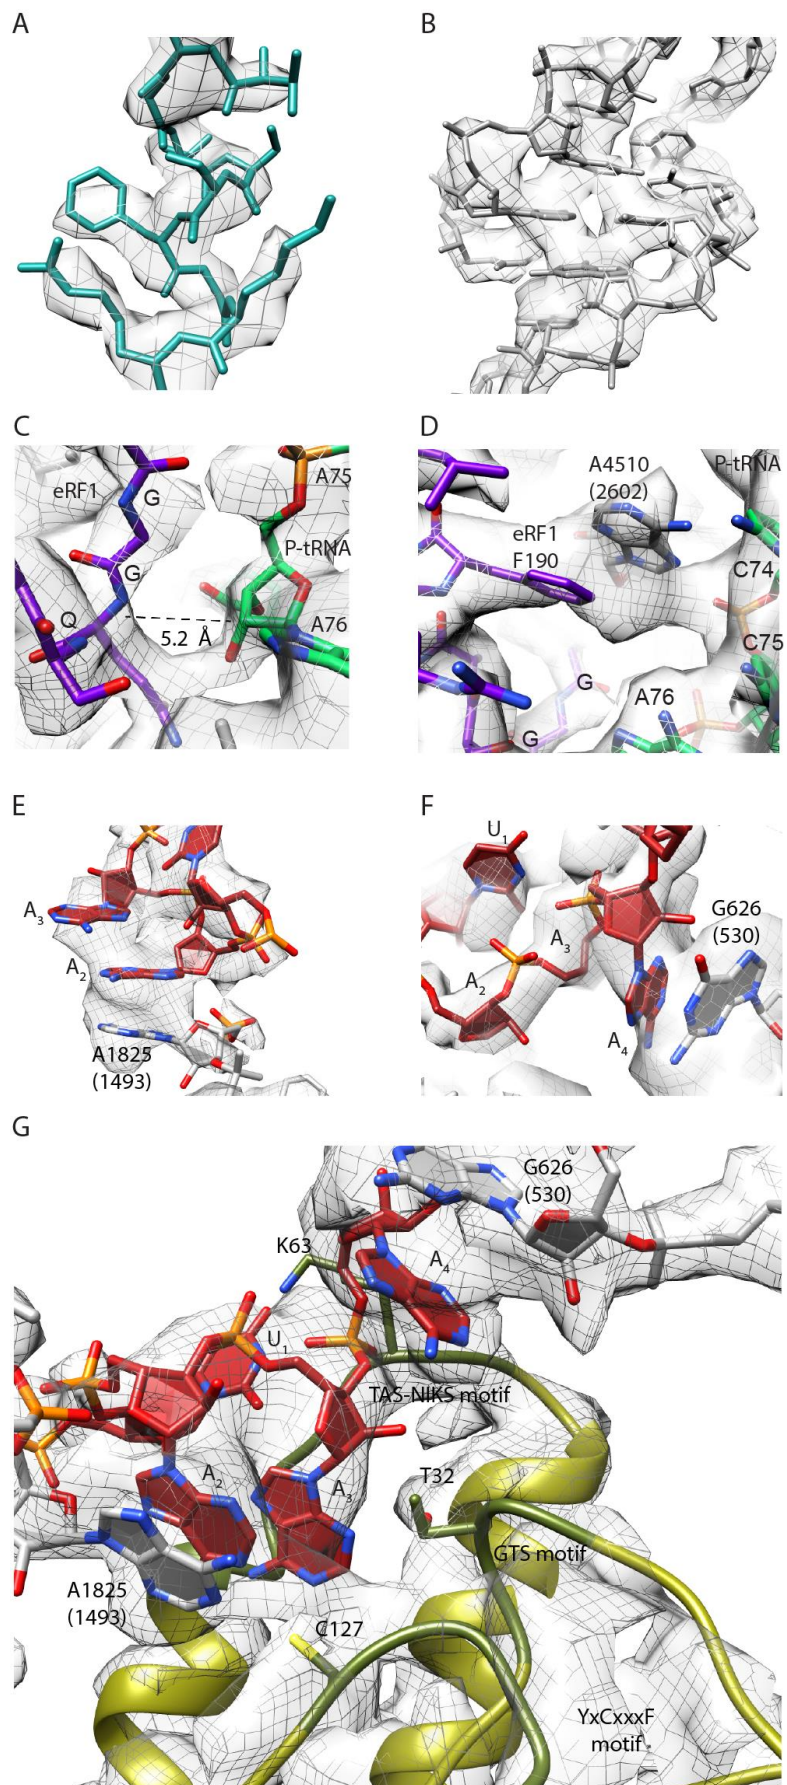

**Figure S2 Electron density representation of selected regions.**

**(A, B)** Electron density (gray mesh) for selected regions of the large ribosomal subunit; **(A)** ribosomal protein and **(B)** rRNA. **(C)** Electron density (gray mesh) for the human eRF1 GGQ-motif (purpleblue) and the peptidyl-tRNA nucleotides C75, A76 (green) within the PTC as shown in Figure 3E. **(D)** Electron density (gray mesh) for the interaction between the base *Hs* A4510 (*Ec* 2602) and eRF1 F190 (purpleblue) as shown in Figure 3G. The peptidyl-tRNA CCA end is shown in green. **(E)** Electron density (gray mesh) for the base stacking interaction of the UAA(A) stop codon ( $A_2$ ,  $A_3$ ) with rRNA base *Hs* A1825 (*Ec* 1493). **(F)** Electron density (gray mesh) for the stacking interaction of  $A_4$  with rRNA base *Hs* G626 (*Ec* 530). **(G)** Electron density (gray mesh) for the interaction region of eRF1 with the stop codon UAA(A). The TAS-NIKS (residues 58-64), YxCxxxF (residues 125-131) and GTS (residues 31-33) motifs are colored in dark green.

**Figure S3**

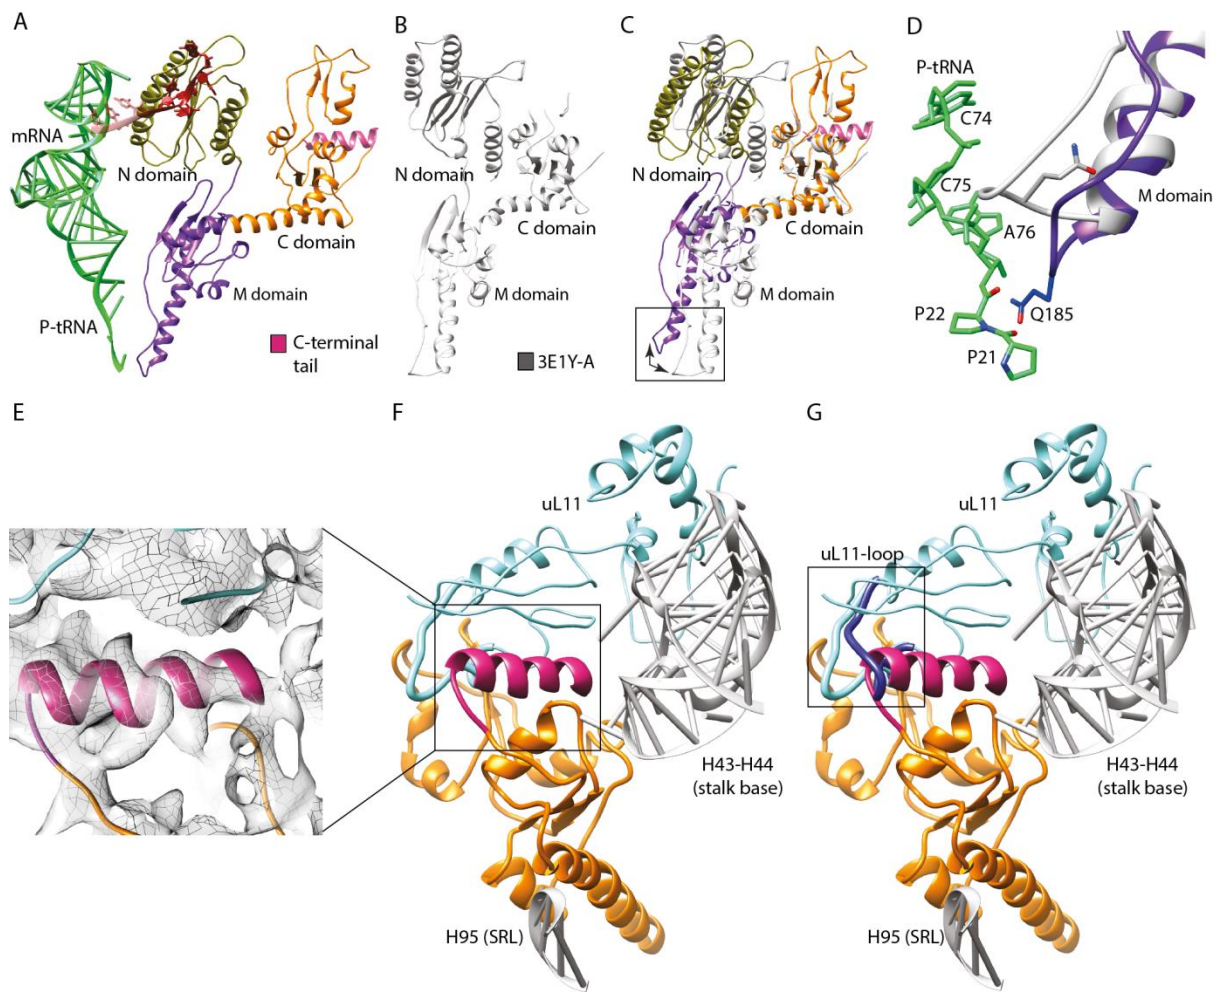

**Figure S3 Comparison of ribosome-bound human eRF1 with the crystal structure.**

**(A)** Ribosome-bound eRF1 in the context of mRNA and P-site tRNA color-coded as in Figure 2D except for the C-terminal tail of eRF1 (residues 421-437; pink). **(B)** Crystal structure of the human eRF1 (from the eRF1-eRF3 complex, Cheng *et al.* (12), pdb code: 3E1Y-A). **(C)** Overlay of the ribosome-bound eRF1 (colored) and eRF3-bound eRF1 (gray). Their alignment was based on the eRF1 C domain. **(D)** Alignment of ribosome-bound eRF1 (purpleblue) and eRF3-bound eRF1 (gray) based on the M domain with resulting overlay of close-up on the GGQ-motif. The GGQ-loop is remodeled in the ribosome-bound conformation positioning the conserved Q close to the ester bond between the terminal adenosine (A76) of the peptidyl-tRNA and P22 of the hCMV nascent peptide. **(E)** Close-up view of the filtered (approx. 4 Å) electron density of the C-terminal tail of eRF1 which forms an  $\alpha$ -helical secondary structure and is not present in the crystal structure. **(F)** Molecular model for the eRF1 C domain bound to the stalk base of the LSU (uL11 and rRNA helices H43-H44). **(G)** The  $\alpha$ -helix of the C-terminal tail of eRF1 (pink) accommodates into a pocket formed by the N-terminal domain of uL11. Thereby, it displaces the uL11-loop formed by residues 28-40 (dark blue loop), which moves towards the inter-subunit space (light blue loop) during eRF1 binding.

**Figure S4**

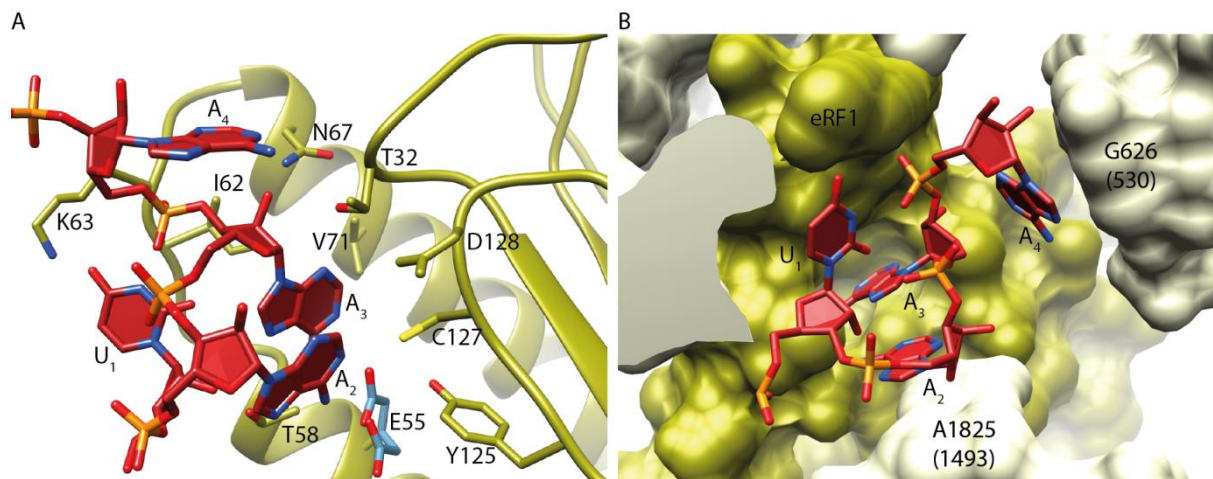

**Figure S4 Binding pocket for the stop codon.**

**(A)** Close-up view on the decoding cavity of the eRF1 N domain (olive) bound to the UAA(A) stop codon (dark red). Relevant residues described previously are depicted as atoms with heteroatoms. **(B)** Surface representation of the UAA(A)-binding cavity formed by the eRF1 N domain and rRNA in the decoding center of the small ribosomal subunit.
